# Supplementary material
Source: publisher figshare collection journal article supplement (https://gsajournals.figshare.com/ndownloader/files/18778934)
Supplement: Supplementary file 1 [file 18778934]

**Table S2: Plasmids**

| Plasmid Name | Brief Description of Use | Source |
| --- | --- | --- |
| | pAG32 | | --- | | pCAS026 | | pFA6-3HA-*kanMX6* | | pGAL414 | | pJHU1263 | | pJHU1264 | | pLenti_Ubc_V5_DEST | | pRS403 | | pRS405 | | pRS406 | | pRS317 | | pUC19 | | pRK1000 | | pRK1006 | | pRK1009 | | pRK1012 | | pRK1028 | | pRK1033 | | pRK1035 | | pRK1036 | | pRK1040 | | pRK1065 | | pRK1083 | | pRK1084 | | pRK1088 | | | *XRS2* cloning | | --- | | *spCas9/URA3/CEN/sgRNA* plasmid | | *MRE11* cloning | | *TEL1* cloning | | *rad531-4/9-12AQ-3xFLAG* plasmid | | *RAD53-3xFLAG* plasmid | | *RAD50* cloning | | *TEL1* cloning | | *RAD50* cloning | | *MRE11* cloning | | Plasmid-end joining assay | | *RAD50* cloning, *XRS2* cloning | | *RAD50*/pRS405 | | *RAD50-G6-V5-LEU2* plasmid | | *XRS2-13myc-KANMX* plasmid | | *MRE11-3HA-URA3* plasmid | | *XRS2-13myc-HYGMX* plasmid | | *RAD50-G6-V5-TRP1* plasmid | | *rad50-10A-G6-V5-TRP1* plasmid | | *mre11-4A-3HA-URA3* plasmid | | *xrs2-4A-13myc-HYGMX* plasmid | | *TEL1* cloning | | *RAD53* cloning | | *RAD53* cloning | | *TEL1-hy909* cloning | | | Goldstein and McCusker 1999 | | --- | | A gift from the Haber Lab | | Bahler et al. 1998 | | Mumberg et al. 1995 | | Lee et al. 2003 | | Lee et al. 2003 | | Gateway Vector (Life Technologies) | | Sikorski and Hieter 1989 | | Sikorski and Hieter 1989 | | Sikorski and Hieter 1989 | | Sikorski and Boeke 1991 | | Norrander et al. 1993 | | This study | | This study | | This study | | This study | | This study | | This study | | This study | | This study | | This study | | This study | | This study | | This study | | This study | |
